# Supplementary material for: Effectiveness of pretend medical play in improving children’s health outcomes and well-being: a systematic review
Source: HighWire-hosted journal article supplement (doi:10.1136/bmjopen-2020-041506), 2021-01-01
Supplement: bmjopen-2020-041506supp003_data_supplement.pdf [file bmjopen-2020-041506supp003_data_supplement.pdf]

Supplementary file number 3 (S3): Quality Assessment of Studies.

[illegible]
